# Supplementary material
Source: PubMed Central journal article supplement (PMC9581342)

Supplemental Figure 1. Decision tree for selection of pre-pregnancy weights

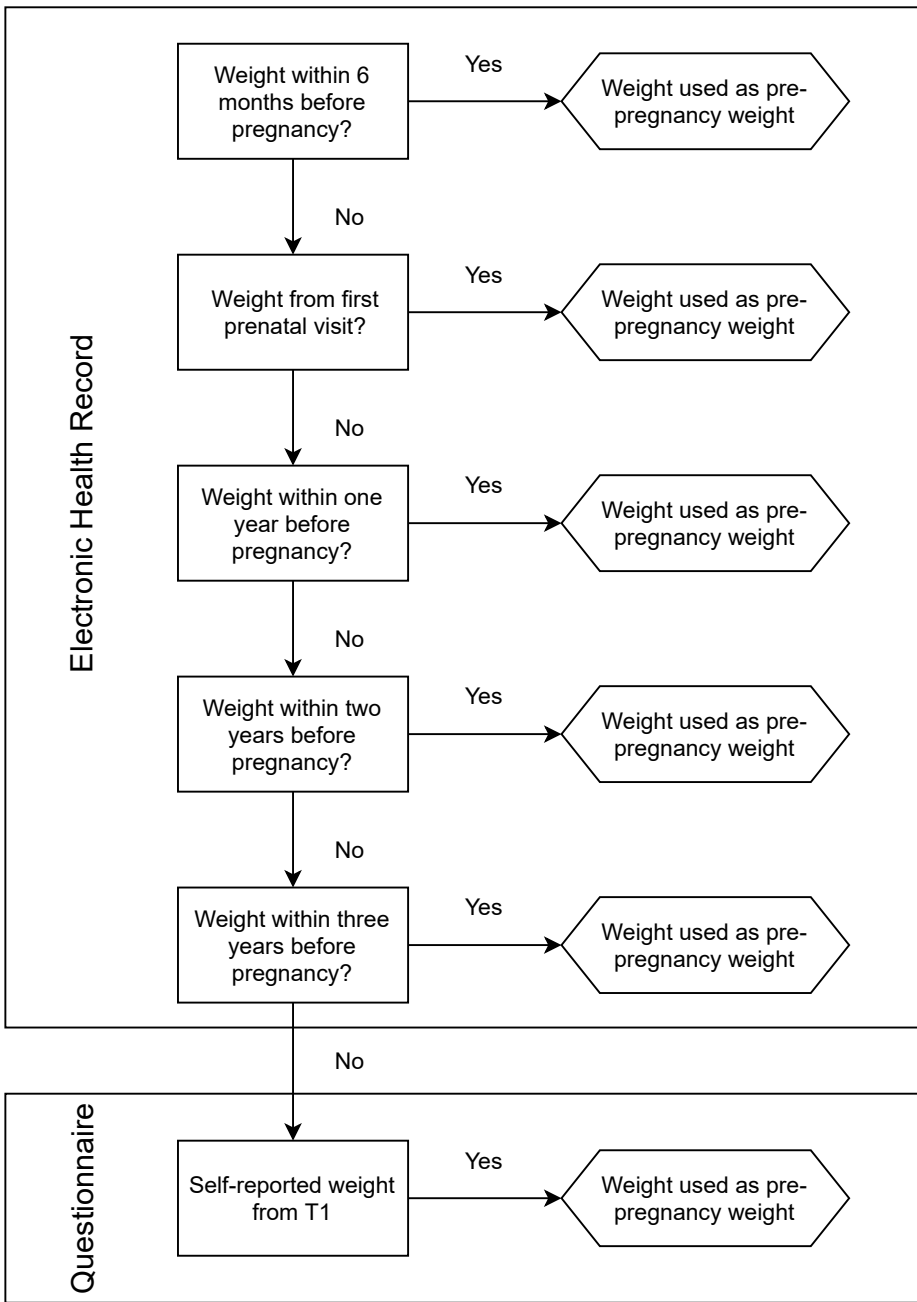

Supplement: NIHMS1792334-supplement-Supplemental_Figure_1.pdf [file NIHMS1792334-supplement-Supplemental_Figure_1.pdf]
